# Supplementary material for: Dynamic and static behavior of hydrogen bonds of the X–H⋯π type (X = F, Cl, Br, I, RO and RR′N; R, R′ = H or Me) in the benzene π-system, elucidated by QTAIM dual functional analysis
Source: Royal Society of Chemistry journal article supplement (doi:10.1039/c5cp04885k), 2015-01-01
Supplement: c5cp04885k1.pdf [file c5cp04885k1.pdf]

## Supplementary Information

### Dynamic and Static Behavior of Hydrogen Bonds of the X–H--- $\pi$ Type (X = F, Cl, Br, I, RO and RR'N; R, R' = H or Me) in Benzene $\pi$ -System, Elucidated by QTAIM Dual Functional Analysis

Yuji Sugibayashi, Satoko Hayashi and Waro Nakanishi\*

*Department of Material Science and Chemistry, Faculty of Systems Engineering,  
Wakayama University, 930 Sakaedani, Wakayama, 640-8510 Japan,*

*Fax: +81 73 457 8253*

*E-mail: nakanisi@sys.wakayama-u.ac.jp*

**Table S1** Structural parameters for X–H--- $\pi$ (C<sub>6</sub>H<sub>6</sub>) optimized at the MP2 level with BSS-F

| Species<br>(symmetry)                                                   | $R_{SL}$<br>(Å) | $r_{BP1}$<br>(Å) | $r_{BP1}$<br>(Å) | $r_{BP}$<br>(Å) | type               |
|-------------------------------------------------------------------------|-----------------|------------------|------------------|-----------------|--------------------|
| F–H--- $\pi$ (C <sub>6</sub> H <sub>6</sub> ) ( $C_s$ )                 | 2.3215          | 0.8561           | 1.4998           | 2.3559          | I <sub>Bzn</sub>   |
| Cl–H--- $\pi$ (C <sub>6</sub> H <sub>6</sub> ) ( $C_s$ )                | 2.6867          | 1.0266           | 1.6875           | 2.7141          | I <sub>Bzn</sub>   |
| Br–H--- $\pi$ (C <sub>6</sub> H <sub>6</sub> ) ( $C_{6v}$ )             | 2.7062          | 1.0451           | 1.6850           | 2.7301          | I <sub>Bzn</sub>   |
| I–H--- $\pi$ (C <sub>6</sub> H <sub>6</sub> ) ( $C_s$ )                 | 2.5780          | 0.9943           | 1.6038           | 2.5981          | I <sub>Bzn</sub>   |
| HO–H--- $\pi$ (C <sub>6</sub> H <sub>6</sub> ) ( $C_s$ )                | 2.4862          | 0.9491           | 1.5640           | 2.5131          | Ia <sub>Bzn</sub>  |
| MeO–H--- $\pi$ (C <sub>6</sub> H <sub>6</sub> ) ( $C_s$ )               | 2.4312          | 0.9339           | 1.5244           | 2.4583          | II <sub>Bzn</sub>  |
| H <sub>2</sub> N–H--- $\pi$ (C <sub>6</sub> H <sub>6</sub> ) ( $C_s$ )  | 2.6999          | 1.0445           | 1.6853           | 2.7298          | Ia <sub>Bzn</sub>  |
| MeHN–H--- $\pi$ (C <sub>6</sub> H <sub>6</sub> ) ( $C_1$ )              | 2.6380          | 1.0123           | 2.1875           | 3.1998          | Iaa <sub>Bzn</sub> |
| Me <sub>2</sub> N–H--- $\pi$ (C <sub>6</sub> H <sub>6</sub> ) ( $C_1$ ) | 2.5744          | 0.9820           | 2.1708           | 3.1528          | Iaa <sub>Bzn</sub> |

## Optimized structures given by Cartesian coordinates

Structures were optimized employing the Gaussian 09 program.<sup>S1</sup> Several types of basis set systems (BSSs: BSS-A, BSS-B, BSS-C, BSS-D, BSS-E and BSS-F) were examined for the evaluation. Table 1 summarizes the BSSs. The basis set for I of the 6-311G\* type<sup>S2</sup> was obtained from EMSL Basis Set Exchange Library.<sup>S3,S4</sup> Higher basis set for I of the (7433211/743111/7411/2 + 1s1p1d1f) type was from Sapporo Basis Set Factory.<sup>S5</sup> The diffusion functions of the *sp* parts for I in (7433211/743111/7411/2 + 1s1p1d1f)<sup>S6</sup> were diverted as those of the *sp* type for the 6-311G\* basis set of I, since the diffusion functions could not be found for 6-311G\* of I. The Møller-Plesset second order energy correlation (MP2) level is applied to the calculations.<sup>S7</sup> The optimized structures were confirmed by the frequency analysis. The abbreviated notation of MP2/BSS-X (X = A, B, C, D, E and F) will also be used to describe the calculation methods employing BSS-X at the MP2 level, if suitable.

**Table S2** Basis set systems employed for the calculations

| Method | C, H           | F, Cl, Br    | I                                                 |
|--------|----------------|--------------|---------------------------------------------------|
| BSS-A  | 6-311G(d, p)   | 6-311G(d)    | (5211111111/4111111111/31111) <sup>a</sup>        |
| BSS-B  | 6-311G(d, p)   | 6-311+G(d)   | (5211111111/4111111111/31111 + 1s1p) <sup>b</sup> |
| BSS-C  | 6-311G(d, p)   | 6-311G(3d)   | (7433211/743111/7411/2 + 1s1p1d1f) <sup>c</sup>   |
| BSS-D  | 6-311G(d, p)   | 6-311G(3df)  | (7433211/743111/7411/2 + 1s1p1d1f) <sup>c</sup>   |
| BSS-E  | 6-311G(d, p)   | 6-311+G(3df) | (7433211/743111/7411/2 + 1s1p1d1f) <sup>c</sup>   |
| BSS-F  | 6-311++G(d, p) | 6-311+G(3df) | (7433211/743111/7411/2 + 1s1p1d1f) <sup>c</sup>   |

<sup>a</sup> The basis set of the 6-311G\* type for I was obtained through EMSL Basis Set Exchange Library.<sup>S3,S4</sup> <sup>b</sup> Diffusion functions of the 1s1p parts in (7433211/743111/7411/2 + 1s1p1d1f)<sup>S5</sup> being employed as the diffusion functions of the 1s1p type for (5211111111/4111111111/31111). <sup>c</sup> The higher basis set of the (7433211/743111/7411/2 + 1s1p1d1f) type for I was obtained from Sapporo Basis Set Factory.<sup>S5</sup>

## References

- S1 *Gaussian 09 (Revision D.01)*, M. J. Frisch, G. W. Trucks, H. B. Schlegel, G. E. Scuseria, M. A. Robb, J. R. Cheeseman, G. Scalmani, V. Barone, B. Mennucci, G. A. Petersson, H. Nakatsuji, M. Caricato, X. Li, H. P. Hratchian, A. F. Izmaylov, J. Bloino, G. Zheng, J. L. Sonnenberg, M. Hada, M. Ehara, K. Toyota, R. Fukuda, J. Hasegawa, M. Ishida, T. Nakajima, Y. Honda, O. Kitao, H. Nakai, T. Vreven, J. A. Montgomery, Jr., J. E. Peralta, F. Ogliaro, M. Bearpark, J. J. Heyd, E. Brothers, K. N. Kudin, V. N. Staroverov, R. Kobayashi, J. Normand, K. Raghavachari, A. Rendell, J. C. Burant, S. S. Iyengar, J. Tomasi, M. Cossi, N. Rega, J. M. Millam, M. Klene, J. E. Knox, J. B. Cross, V. Bakken, C. Adamo, J. Jaramillo, R. Gomperts, R. E. Stratmann, O. Yazyev, A. J. Austin, R. Cammi, C. Pomelli, J. W. Ochterski, R. L. Martin, K. Morokuma, V. G. Zakrzewski, G. A. Voth, P. Salvador, J. J. Dannenberg, S. Dapprich, A. D. Daniels, Ö. Farkas, J. B. Foresman, J. V. Ortiz, J. Cioslowski and D. J. Fox, Gaussian, Inc.: Wallingford CT, 2009.
- S2 For the 6-311G(3d) basis sets, see: (a) R. C. Binning Jr. and L. A. Curtiss, *J. Comput. Chem.*, 1990, **11**, 1206-1216; (b) L. A. Curtiss, M. P. McGrath, J.-P. Blaudeau, N. E. Davis, R. C.

- Binning Jr. and L. Radom, *J. Chem. Phys.*, 1995, **103**, 6104-6113; (c) M. P. McGrath and L. Radom, *J. Chem. Phys.*, 1991, **94**, 511-516. For the diffuse functions (+ and ++), see: T. Clark, J. Chandrasekhar, G. W. Spitznagel and P. v. R. Schleyer, *J. Comput. Chem.*, 1983, **4**, 294-301.
- S3 D. Feller, *J. Comp. Chem.*, 1996, **17**, 1571-1586.
- S4 K. L. Schuchardt, B. T. Didier, T. Elsethagen, L. Sun, V. Gurumoorthi, J. Chase, J. Li and T. L. Windus, *J. Chem. Inf. Model.*, 2007, **47**, 1045-1052.
- S5 T. Noro, M. Sekiya and T. Koga, *Theoret. Chem. Acc.*, 2012, **131**, 1124.
- S6 (a) For inner and valence shells: T. Koga, S. Yamamoto, T. Shimazaki and H. Tatewaki, *Theor. Chem. Acc.*, 2002, **108**, 41-45; (b) For valence correlated set: M. Sekiya, T. Noro, Y. Osanai and T. Koga, *Theor. Chem. Acc.*, 2001, **106**, 297-300.
- S7 C. Møller and M. S. Plesset, *Phys. Rev.*, 1934, **46**, 618-622; J. Gauss, *J. Chem. Phys.*, 1993, **99**, 3629-3643; J. Gauss, *Ber. Bunsen-Ges. Phys. Chem.*, 1995, **99**, 1001-1008.

|                      |                                               |           |           |           |  |
|----------------------|-----------------------------------------------|-----------|-----------|-----------|--|
| MP2/BSS-A            | C, H, F: 6-311G(d,p)                          |           |           |           |  |
| Adduct               | F-H--- $\pi$ (C <sub>6</sub> H <sub>6</sub> ) |           |           |           |  |
| Symmetry             | C <sub>s</sub>                                |           |           |           |  |
| Energy               | E = -331.8536911 au                           |           |           |           |  |
| Standard orientation |                                               |           |           |           |  |
| 6                    | 0                                             | -0.572264 | 1.148568  | 0.700839  |  |
| 6                    | 0                                             | -0.572264 | 1.148568  | -0.700839 |  |
| 6                    | 0                                             | -0.569996 | -0.064980 | 1.400451  |  |
| 6                    | 0                                             | -0.569996 | -0.064980 | -1.400451 |  |
| 6                    | 0                                             | -0.569996 | -1.276241 | 0.699692  |  |
| 6                    | 0                                             | -0.569996 | -1.276241 | -0.699692 |  |
| 1                    | 0                                             | -0.567869 | 2.089374  | 1.243568  |  |
| 1                    | 0                                             | -0.567869 | 2.089374  | -1.243568 |  |
| 1                    | 0                                             | -0.561650 | -0.064535 | 2.486289  |  |
| 1                    | 0                                             | -0.561650 | -0.064535 | -2.486289 |  |
| 1                    | 0                                             | -0.561092 | -2.216595 | 1.242598  |  |
| 1                    | 0                                             | -0.561092 | -2.216595 | -1.242598 |  |
| 1                    | 0                                             | 1.584590  | 0.436348  | 0.000000  |  |
| 9                    | 0                                             | 2.482633  | 0.250998  | 0.000000  |  |

|                      |                                                |           |           |           |  |
|----------------------|------------------------------------------------|-----------|-----------|-----------|--|
| MP2/BSS-A            | C, H, Cl: 6-311G(d,p)                          |           |           |           |  |
| Adduct               | Cl-H--- $\pi$ (C <sub>6</sub> H <sub>6</sub> ) |           |           |           |  |
| Symmetry             | C <sub>1</sub>                                 |           |           |           |  |
| Energy               | E = -691.8288301 au                            |           |           |           |  |
| Standard orientation |                                                |           |           |           |  |
| 6                    | 0                                              | -0.980686 | -1.038018 | 0.967214  |  |
| 6                    | 0                                              | -0.941018 | 0.295455  | 1.394261  |  |
| 6                    | 0                                              | -1.106749 | -1.332841 | -0.395757 |  |
| 6                    | 0                                              | -1.027863 | 1.333209  | 0.457707  |  |
| 6                    | 0                                              | -1.193380 | -0.295204 | -1.331225 |  |
| 6                    | 0                                              | -1.153838 | 1.037396  | -0.904805 |  |
| 1                    | 0                                              | -0.911816 | -1.842904 | 1.693422  |  |
| 1                    | 0                                              | -0.842293 | 0.524508  | 2.451558  |  |
| 1                    | 0                                              | -1.134500 | -2.366879 | -0.726970 |  |
| 1                    | 0                                              | -0.994966 | 2.367214  | 0.788756  |  |
| 1                    | 0                                              | -1.287554 | -0.524278 | -2.388719 |  |
| 1                    | 0                                              | -1.217782 | 1.842335  | -1.631195 |  |

|    |   |          |           |           |
|----|---|----------|-----------|-----------|
| 1  | 0 | 1.300770 | 0.000089  | 0.139003  |
| 17 | 0 | 2.559373 | -0.000004 | -0.085307 |

MP2/BSS-A C, H, Br: 6-311G(d,p)  
 Adduct Br-H--- $\pi$ (C<sub>6</sub>H<sub>6</sub>)  
 Symmetry C<sub>1</sub>  
 Energy  $E = -2804.6746855$  au  
 Standard orientation

|    |   |           |           |           |
|----|---|-----------|-----------|-----------|
| 6  | 0 | -1.726673 | 1.190654  | -0.732944 |
| 6  | 0 | -1.734373 | -0.042475 | -1.395728 |
| 6  | 0 | -1.710424 | 1.233256  | 0.666390  |
| 6  | 0 | -1.725835 | -1.233136 | -0.659377 |
| 6  | 0 | -1.701870 | 0.042487  | 1.402957  |
| 6  | 0 | -1.709585 | -1.190776 | 0.739971  |
| 1  | 0 | -1.730391 | 2.114447  | -1.304318 |
| 1  | 0 | -1.743968 | -0.075433 | -2.481395 |
| 1  | 0 | -1.701750 | 2.189998  | 1.180683  |
| 1  | 0 | -1.728914 | -2.189887 | -1.173668 |
| 1  | 0 | -1.686689 | 0.075444  | 2.488610  |
| 1  | 0 | -1.700273 | -2.114560 | 1.311345  |
| 1  | 0 | 0.628138  | 0.000058  | 0.044873  |
| 35 | 0 | 2.043326  | -0.000004 | -0.005535 |

MP2/BSS-A C, H: 6-311G(d,p), I: 5211111111/4111111111/31111  
 Adduct I-H--- $\pi$ (C<sub>6</sub>H<sub>6</sub>)  
 Symmetry C<sub>s</sub>  
 Energy  $E = -7149.1980749$  au  
 Standard orientation

|    |   |           |           |           |
|----|---|-----------|-----------|-----------|
| 6  | 0 | -2.220508 | 1.200812  | 0.700104  |
| 6  | 0 | -2.220508 | 1.200812  | -0.700104 |
| 6  | 0 | -2.220508 | -0.011771 | 1.399991  |
| 6  | 0 | -2.220508 | -0.011771 | -1.399991 |
| 6  | 0 | -2.220391 | -1.223987 | 0.699896  |
| 6  | 0 | -2.220391 | -1.223987 | -0.699896 |
| 1  | 0 | -2.219299 | 2.141646  | 1.243253  |
| 1  | 0 | -2.219299 | 2.141646  | -1.243253 |
| 1  | 0 | -2.218754 | -0.011723 | 2.486298  |
| 1  | 0 | -2.218754 | -0.011723 | -2.486298 |
| 1  | 0 | -2.218184 | -2.164717 | 1.243035  |
| 1  | 0 | -2.218184 | -2.164717 | -1.243035 |
| 1  | 0 | 0.151585  | 0.113527  | 0.000000  |
| 53 | 0 | 1.756562  | 0.007083  | 0.000000  |

MP2/BSS-B C, H: 6-311G(d,p), F: 6-311+G(d)  
 Adduct F-H--- $\pi$ (C<sub>6</sub>H<sub>6</sub>)  
 Symmetry C<sub>s</sub>  
 Energy  $E = -331.8654946$  au  
 Standard orientation

|   |   |           |           |           |
|---|---|-----------|-----------|-----------|
| 6 | 0 | -0.592254 | 1.083374  | 0.700969  |
| 6 | 0 | -0.592254 | 1.083374  | -0.700969 |
| 6 | 0 | -0.591076 | -0.130401 | 1.400746  |
| 6 | 0 | -0.591076 | -0.130401 | -1.400746 |

|   |   |           |           |           |
|---|---|-----------|-----------|-----------|
| 6 | 0 | -0.591076 | -1.341942 | 0.699887  |
| 6 | 0 | -0.591076 | -1.341942 | -0.699887 |
| 1 | 0 | -0.590982 | 2.024403  | 1.243640  |
| 1 | 0 | -0.590982 | 2.024403  | -1.243640 |
| 1 | 0 | -0.587528 | -0.129796 | 2.486792  |
| 1 | 0 | -0.587528 | -0.129796 | -2.486792 |
| 1 | 0 | -0.586871 | -2.282445 | 1.242948  |
| 1 | 0 | -0.586871 | -2.282445 | -1.242948 |
| 1 | 0 | 1.653054  | 0.519876  | 0.000000  |
| 9 | 0 | 2.574510  | 0.547047  | 0.000000  |

MP2/BSS-B C, H: 6-311G(d,p), Cl: 6-311+G(d)  
 Adduct Cl-H--- $\pi$ (C<sub>6</sub>H<sub>6</sub>)  
 Symmetry C<sub>1</sub>  
 Energy E = -691.830449 au

Standard orientation

|    |   |           |           |           |
|----|---|-----------|-----------|-----------|
| 6  | 0 | -1.014100 | 0.245508  | 1.389357  |
| 6  | 0 | -1.044538 | 1.316754  | 0.487760  |
| 6  | 0 | -1.030202 | -1.071342 | 0.912741  |
| 6  | 0 | -1.090935 | 1.071071  | -0.889980 |
| 6  | 0 | -1.076636 | -1.316578 | -0.465164 |
| 6  | 0 | -1.106966 | -0.245414 | -1.366294 |
| 1  | 0 | -0.976011 | 0.435898  | 2.458119  |
| 1  | 0 | -1.029514 | 2.338051  | 0.857348  |
| 1  | 0 | -1.004290 | -1.902232 | 1.611924  |
| 1  | 0 | -1.111300 | 1.901991  | -1.589217 |
| 1  | 0 | -1.086081 | -2.337894 | -0.834788 |
| 1  | 0 | -1.139572 | -0.435814 | -2.435140 |
| 1  | 0 | 1.270800  | 0.000004  | 0.063947  |
| 17 | 0 | 2.544484  | 0.000000  | -0.031924 |

MP2/BSS-B C, H: 6-311G(d,p), Br: 6-311+G(d)  
 Adduct Br-H--- $\pi$ (C<sub>6</sub>H<sub>6</sub>)  
 Symmetry C<sub>s</sub>  
 Energy E = -2804.8285695 au

Standard orientation

|    |   |           |           |           |
|----|---|-----------|-----------|-----------|
| 6  | 0 | -1.708536 | 1.189073  | 0.700229  |
| 6  | 0 | -1.708536 | 1.189073  | -0.700229 |
| 6  | 0 | -1.708536 | -0.023736 | 1.400258  |
| 6  | 0 | -1.708536 | -0.023736 | -1.400258 |
| 6  | 0 | -1.708470 | -1.236203 | 0.700032  |
| 6  | 0 | -1.708470 | -1.236203 | -0.700032 |
| 1  | 0 | -1.706834 | 2.129847  | 1.243339  |
| 1  | 0 | -1.706834 | 2.129847  | -1.243339 |
| 1  | 0 | -1.706368 | -0.023677 | 2.486505  |
| 1  | 0 | -1.706368 | -0.023677 | -2.486505 |
| 1  | 0 | -1.705861 | -2.176881 | 1.243156  |
| 1  | 0 | -1.705861 | -2.176881 | -1.243156 |
| 1  | 0 | 0.621310  | 0.083531  | 0.000000  |
| 35 | 0 | 2.032095  | 0.025951  | 0.000000  |

MP2/BSS-B C, H: 6-311G(d,p), I: 5211111111/4111111111/31111 + 1s1p

Adduct I-H--- $\pi$ (C<sub>6</sub>H<sub>6</sub>)  
 Symmetry C<sub>1</sub>  
 Energy E = -7149.198852 au  
 Standard orientation

|    |   |           |           |           |
|----|---|-----------|-----------|-----------|
| 6  | 0 | -2.208281 | 1.398928  | -0.066896 |
| 6  | 0 | -2.212834 | 0.641539  | -1.244714 |
| 6  | 0 | -2.212147 | 0.757399  | 1.177852  |
| 6  | 0 | -2.220884 | -0.756841 | -1.177556 |
| 6  | 0 | -2.220226 | -0.641035 | 1.244452  |
| 6  | 0 | -2.224500 | -1.397910 | 0.066866  |
| 1  | 0 | -2.201980 | 2.484081  | -0.118785 |
| 1  | 0 | -2.209457 | 1.139216  | -2.210367 |
| 1  | 0 | -2.208314 | 1.344956  | 2.091611  |
| 1  | 0 | -2.223015 | -1.344284 | -2.091298 |
| 1  | 0 | -2.221902 | -1.138601 | 2.210089  |
| 1  | 0 | -2.229091 | -2.482923 | 0.118754  |
| 1  | 0 | 0.152588  | 0.153813  | -0.000048 |
| 53 | 0 | 1.753479  | -0.003184 | 0.000000  |

MP2/BSS-B C, H: 6-311G(d,p), O: 6-311+G(d)  
 Adduct HO-H--- $\pi$ (C<sub>6</sub>H<sub>6</sub>)  
 Symmetry C<sub>s</sub>  
 Energy E = -307.8593517 au  
 Standard orientation

|   |   |           |           |           |
|---|---|-----------|-----------|-----------|
| 6 | 0 | -0.623285 | -1.260642 | 0.700133  |
| 6 | 0 | -0.623285 | -1.260642 | -0.700133 |
| 6 | 0 | -0.623714 | -0.048569 | 1.400398  |
| 6 | 0 | -0.623714 | -0.048569 | -1.400398 |
| 6 | 0 | -0.623714 | 1.164234  | 0.700327  |
| 6 | 0 | -0.623714 | 1.164234  | -0.700327 |
| 1 | 0 | -0.626113 | -2.201319 | 1.243630  |
| 1 | 0 | -0.626113 | -2.201319 | -1.243630 |
| 1 | 0 | -0.621430 | -0.047824 | 2.486536  |
| 1 | 0 | -0.621430 | -0.047824 | -2.486536 |
| 1 | 0 | -0.620914 | 2.104992  | 1.243279  |
| 1 | 0 | -0.620914 | 2.104992  | -1.243279 |
| 1 | 0 | 1.747705  | 0.395170  | 0.000000  |
| 8 | 0 | 2.703549  | 0.287374  | 0.000000  |
| 1 | 0 | 2.809381  | -0.666137 | 0.000000  |

MP2/BSS-B C, H: 6-311G(d,p), O: 6-311+G(d)  
 Adduct OH<sub>2</sub>--- $\pi$ (C<sub>6</sub>H<sub>6</sub>)  
 Symmetry C<sub>2</sub>  
 Energy E = -307.8588854 au  
 Standard orientation

|   |   |           |           |           |
|---|---|-----------|-----------|-----------|
| 6 | 0 | 0.000000  | 1.399966  | -0.610391 |
| 6 | 0 | -1.212805 | 0.699290  | -0.610391 |
| 6 | 0 | 1.212674  | 0.700600  | -0.609313 |
| 6 | 0 | -1.212674 | -0.700600 | -0.609313 |
| 6 | 0 | 1.212805  | -0.699290 | -0.610391 |
| 6 | 0 | 0.000000  | -1.399966 | -0.610391 |
| 1 | 0 | -0.000012 | 2.486457  | -0.616319 |
| 1 | 0 | -2.154038 | 1.242008  | -0.616329 |

|   |   |           |           |           |
|---|---|-----------|-----------|-----------|
| 1 | 0 | 2.153105  | 1.243917  | -0.608874 |
| 1 | 0 | -2.153105 | -1.243917 | -0.608874 |
| 1 | 0 | 2.154038  | -1.242008 | -0.616329 |
| 1 | 0 | 0.000012  | -2.486457 | -0.616319 |
| 1 | 0 | 0.372593  | -0.644214 | 2.078014  |
| 8 | 0 | 0.000000  | 0.000000  | 2.686020  |
| 1 | 0 | -0.372593 | 0.644214  | 2.078014  |
| 8 | 0 | 2.703549  | 0.287374  | 0.000000  |
| 1 | 0 | 2.809381  | -0.666137 | 0.000000  |

MP2/BSS-B C, H: 6-311G(d,p), O: 6-311+G(d)  
Adduct MeO-H--- $\pi$ (C<sub>6</sub>H<sub>6</sub>)  
Symmetry C<sub>1</sub>  
Energy  $E = -347.0310345$  au  
Standard orientation

|   |   |           |           |           |
|---|---|-----------|-----------|-----------|
| 6 | 0 | -0.686813 | 1.296784  | -0.700298 |
| 6 | 0 | -1.010020 | 0.128359  | -1.400317 |
| 6 | 0 | -0.686779 | 1.296886  | 0.700116  |
| 6 | 0 | -1.335610 | -1.040329 | -0.700200 |
| 6 | 0 | -1.009951 | 0.128562  | 1.400320  |
| 6 | 0 | -1.335575 | -1.040227 | 0.700389  |
| 1 | 0 | -0.437149 | 2.203849  | -1.243667 |
| 1 | 0 | -1.006933 | 0.126654  | -2.486514 |
| 1 | 0 | -0.437088 | 2.204030  | 1.243341  |
| 1 | 0 | -1.583070 | -1.947923 | -1.243144 |
| 1 | 0 | -1.006811 | 0.127015  | 2.486517  |
| 1 | 0 | -1.583008 | -1.947743 | 1.243477  |
| 1 | 0 | 1.104624  | -0.812004 | -0.000005 |
| 8 | 0 | 2.048935  | -0.991469 | -0.000007 |
| 6 | 0 | 2.707258  | 0.264238  | -0.000002 |
| 1 | 0 | 3.779029  | 0.061280  | -0.000004 |
| 1 | 0 | 2.461935  | 0.855481  | -0.890598 |
| 1 | 0 | 2.461937  | 0.855472  | 0.890601  |

MP2/BSS-B C, H: 6-311G(d,p), N: 6-311+G(d)  
Adduct H<sub>2</sub>N-H--- $\pi$ (C<sub>6</sub>H<sub>6</sub>)  
Symmetry C<sub>s</sub>  
Energy  $E = -287.9983609$  au  
Standard orientation

|   |   |           |           |           |
|---|---|-----------|-----------|-----------|
| 6 | 0 | -0.659887 | -0.658671 | 1.212129  |
| 6 | 0 | -0.659887 | 0.741311  | 1.212103  |
| 6 | 0 | -0.659532 | -1.358756 | 0.000000  |
| 6 | 0 | -0.660463 | 1.441423  | 0.000000  |
| 6 | 0 | -0.659887 | -0.658671 | -1.212129 |
| 6 | 0 | -0.659887 | 0.741311  | -1.212103 |
| 1 | 0 | -0.657563 | -1.202444 | 2.152583  |
| 1 | 0 | -0.661474 | 1.284386  | 2.153139  |
| 1 | 0 | -0.652632 | -2.444829 | 0.000000  |
| 1 | 0 | -0.661496 | 2.527874  | 0.000000  |
| 1 | 0 | -0.657563 | -1.202444 | -2.152583 |
| 1 | 0 | -0.661474 | 1.284386  | -2.153139 |
| 1 | 0 | 1.794897  | -0.234883 | 0.000000  |
| 7 | 0 | 2.808187  | -0.280221 | 0.000000  |

|   |   |          |          |           |
|---|---|----------|----------|-----------|
| 1 | 0 | 3.128627 | 0.230911 | -0.814787 |
| 1 | 0 | 3.128627 | 0.230911 | 0.814787  |

MP2/BSS-B C, H: 6-311G(d,p), N: 6-311+G(d)

Adduct MeHN-H--- $\pi$ (C<sub>6</sub>H<sub>6</sub>)

Symmetry C<sub>1</sub>

Energy E = -327.1779792 au

Standard orientation

|   |   |           |           |           |
|---|---|-----------|-----------|-----------|
| 6 | 0 | 1.533133  | -1.110003 | 0.359395  |
| 6 | 0 | 1.469719  | -0.718110 | -0.983287 |
| 6 | 0 | 1.108667  | -0.233056 | 1.365043  |
| 6 | 0 | 0.982877  | 0.550781  | -1.320286 |
| 6 | 0 | 0.621843  | 1.035295  | 1.027589  |
| 6 | 0 | 0.560176  | 1.427825  | -0.314834 |
| 1 | 0 | 1.909608  | -2.094802 | 0.621286  |
| 1 | 0 | 1.799859  | -1.398365 | -1.763550 |
| 1 | 0 | 1.152637  | -0.539068 | 2.406329  |
| 1 | 0 | 0.935167  | 0.855134  | -2.362235 |
| 1 | 0 | 0.293157  | 1.715690  | 1.808264  |
| 1 | 0 | 0.183864  | 2.413077  | -0.575880 |
| 1 | 0 | -1.105282 | -0.900620 | 0.052417  |
| 7 | 0 | -2.106859 | -1.051641 | 0.001367  |
| 1 | 0 | -2.280896 | -1.553802 | -0.862683 |
| 6 | 0 | -2.801114 | 0.236667  | -0.020611 |
| 1 | 0 | -3.878850 | 0.064062  | -0.080731 |
| 1 | 0 | -2.601012 | 0.761825  | 0.916432  |
| 1 | 0 | -2.512038 | 0.901956  | -0.847276 |

MP2/BSS-B C, H: 6-311G(d,p), N: 6-311+G(d)

Adduct Me<sub>2</sub>N-H--- $\pi$ (C<sub>6</sub>H<sub>6</sub>)

Symmetry C<sub>1</sub>

Energy E = -366.3646689 au

Standard orientation

|   |   |           |           |           |
|---|---|-----------|-----------|-----------|
| 6 | 0 | 1.021577  | -0.699911 | 1.278174  |
| 6 | 0 | 1.021586  | 0.699760  | 1.278257  |
| 6 | 0 | 1.335733  | -1.400042 | 0.106823  |
| 6 | 0 | 1.335734  | 1.400028  | 0.106985  |
| 6 | 0 | 1.649057  | -0.700330 | -1.064690 |
| 6 | 0 | 1.649064  | 0.700451  | -1.064607 |
| 1 | 0 | 0.779851  | -1.243485 | 2.187405  |
| 1 | 0 | 0.779856  | 1.243230  | 2.187551  |
| 1 | 0 | 1.336430  | -2.486594 | 0.107055  |
| 1 | 0 | 1.336449  | 2.486579  | 0.107349  |
| 1 | 0 | 1.890642  | -1.243068 | -1.974241 |
| 1 | 0 | 1.890633  | 1.243295  | -1.974100 |
| 1 | 0 | -0.835196 | 0.000000  | -0.704815 |
| 7 | 0 | -1.848958 | 0.000006  | -0.683570 |
| 6 | 0 | -2.306716 | 1.201881  | -0.001336 |
| 1 | 0 | -3.398222 | 1.257573  | -0.067987 |
| 1 | 0 | -1.887955 | 2.085223  | -0.490183 |
| 1 | 0 | -2.029679 | 1.228459  | 1.067681  |
| 6 | 0 | -2.306733 | -1.201853 | -0.001321 |
| 1 | 0 | -3.398240 | -1.257531 | -0.067970 |



|   |   |           |           |           |
|---|---|-----------|-----------|-----------|
| 1 | 0 | -1.887986 | -2.085208 | -0.490157 |
| 1 | 0 | -2.029696 | -1.228422 | 1.067696  |

MP2/BSS-D C, H: 6-311G(d,p), F: 6-311G(3df)

Adduct F-H--- $\pi$ (C<sub>6</sub>H<sub>6</sub>)

Symmetry C<sub>1</sub>

Energy E = -331.9027395 au

Standard orientation

|   |   |           |           |           |
|---|---|-----------|-----------|-----------|
| 6 | 0 | -0.006534 | -0.002212 | 1.452682  |
| 6 | 0 | -0.273699 | 1.212422  | 0.806332  |
| 6 | 0 | -0.275166 | -1.214629 | 0.802792  |
| 6 | 0 | -0.809603 | 1.213325  | -0.486937 |
| 6 | 0 | -0.811075 | -1.211112 | -0.490465 |
| 6 | 0 | -1.079826 | 0.002208  | -1.133547 |
| 1 | 0 | 0.415223  | -0.003924 | 2.453631  |
| 1 | 0 | -0.055742 | 2.151661  | 1.305977  |
| 1 | 0 | -0.058341 | -2.155582 | 1.299695  |
| 1 | 0 | -1.008466 | 2.154615  | -0.990373 |
| 1 | 0 | -1.011080 | -2.150690 | -0.996642 |
| 1 | 0 | -1.487585 | 0.003923  | -2.139949 |
| 1 | 0 | 1.592055  | -0.000010 | -0.194910 |
| 9 | 0 | 2.349927  | -0.000002 | -0.715840 |

MP2/BSS-D C, H: 6-311G(d,p), Cl: 6-311G(3df)

Adduct Cl-H--- $\pi$ (C<sub>6</sub>H<sub>6</sub>)

Symmetry C<sub>1</sub>

Energy E = -691.8824335 au

Standard orientation

|    |   |           |           |           |
|----|---|-----------|-----------|-----------|
| 6  | 0 | -0.918585 | -0.803599 | 1.177605  |
| 6  | 0 | -0.905076 | 0.592393  | 1.298869  |
| 6  | 0 | -1.057896 | -1.395058 | -0.084242 |
| 6  | 0 | -1.031231 | 1.395235  | 0.157997  |
| 6  | 0 | -1.183224 | -0.591676 | -1.223486 |
| 6  | 0 | -1.169861 | 0.802715  | -1.102507 |
| 1  | 0 | -0.819048 | -1.426327 | 2.062157  |
| 1  | 0 | -0.795541 | 1.051405  | 2.277390  |
| 1  | 0 | -1.064570 | -2.477094 | -0.178372 |
| 1  | 0 | -1.017346 | 2.477250  | 0.251874  |
| 1  | 0 | -1.286192 | -1.050768 | -2.202383 |
| 1  | 0 | -1.262653 | 1.425545  | -1.987425 |
| 1  | 0 | 1.265528  | 0.000191  | 0.229522  |
| 17 | 0 | 2.504415  | -0.000016 | -0.105775 |

MP2/BSS-D C, H: 6-311G(d,p), Br: 6-311G(3df)

Adduct Br-H--- $\pi$ (C<sub>6</sub>H<sub>6</sub>)

Symmetry C<sub>1</sub>

Energy E = -2804.8964197 au

Standard orientation

|   |   |           |           |           |
|---|---|-----------|-----------|-----------|
| 6 | 0 | -1.752596 | 0.755424  | -1.160940 |
| 6 | 0 | -1.755974 | -0.642855 | -1.225798 |
| 6 | 0 | -1.688070 | 1.398877  | 0.080605  |
| 6 | 0 | -1.694827 | -1.398810 | -0.049216 |

|    |   |           |           |           |
|----|---|-----------|-----------|-----------|
| 6  | 0 | -1.626359 | 0.643417  | 1.258310  |
| 6  | 0 | -1.629794 | -0.756052 | 1.193341  |
| 1  | 0 | -1.796198 | 1.341596  | -2.074318 |
| 1  | 0 | -1.802137 | -1.141685 | -2.189537 |
| 1  | 0 | -1.682157 | 2.483922  | 0.131010  |
| 1  | 0 | -1.694118 | -2.483864 | -0.099550 |
| 1  | 0 | -1.573573 | 1.142169  | 2.221974  |
| 1  | 0 | -1.579561 | -1.342137 | 2.106658  |
| 1  | 0 | 0.611610  | 0.000018  | 0.213443  |
| 35 | 0 | 2.011482  | -0.000001 | -0.025357 |

MP2/BSS-D C, H: 6-311G(d,p), I: 7433211/743111/7411/2 + 1s1p1d1f  
 Adduct I-H--- $\pi$ (C<sub>6</sub>H<sub>6</sub>)  
 Symmetry C<sub>1</sub>  
 Energy E = -7150.2553657 au  
 Standard orientation

|    |   |           |           |           |
|----|---|-----------|-----------|-----------|
| 6  | 0 | -2.151882 | -0.719878 | -1.194661 |
| 6  | 0 | -2.165681 | -1.388676 | 0.036625  |
| 6  | 0 | -2.120502 | 0.679568  | -1.230531 |
| 6  | 0 | -2.150507 | -0.656477 | 1.231239  |
| 6  | 0 | -2.103332 | 1.410353  | -0.036577 |
| 6  | 0 | -2.119011 | 0.742884  | 1.193922  |
| 1  | 0 | -2.163277 | -1.287637 | -2.120941 |
| 1  | 0 | -2.189440 | -2.474645 | 0.065004  |
| 1  | 0 | -2.106231 | 1.197842  | -2.185204 |
| 1  | 0 | -2.160730 | -1.175074 | 2.185917  |
| 1  | 0 | -2.075052 | 2.495976  | -0.064955 |
| 1  | 0 | -2.103539 | 1.310319  | 2.120196  |
| 1  | 0 | 0.118340  | -0.379295 | -0.000041 |
| 53 | 0 | 1.689536  | -0.001776 | -0.000001 |

MP2/BSS-F C, H: 6-311++G(d,p), F: 6-311+G(3df)  
 Adduct F-H--- $\pi$ (C<sub>6</sub>H<sub>6</sub>)  
 Symmetry C<sub>s</sub>  
 Energy E = -331.9201056 au  
 Standard orientation

|   |   |           |           |           |
|---|---|-----------|-----------|-----------|
| 6 | 0 | -0.588536 | 1.111726  | 0.701399  |
| 6 | 0 | -0.588536 | 1.111726  | -0.701399 |
| 6 | 0 | -0.587877 | -0.102877 | 1.401678  |
| 6 | 0 | -0.587877 | -0.102877 | -1.401678 |
| 6 | 0 | -0.587877 | -1.315490 | 0.700407  |
| 6 | 0 | -0.587877 | -1.315490 | -0.700407 |
| 1 | 0 | -0.587365 | 2.052905  | 1.244360  |
| 1 | 0 | -0.587365 | 2.052905  | -1.244360 |
| 1 | 0 | -0.583858 | -0.102345 | 2.488071  |
| 1 | 0 | -0.583858 | -0.102345 | -2.488071 |
| 1 | 0 | -0.582929 | -2.256262 | 1.243677  |
| 1 | 0 | -0.582929 | -2.256262 | -1.243677 |
| 1 | 0 | 1.635472  | 0.445989  | 0.000000  |
| 9 | 0 | 2.560479  | 0.427234  | 0.000000  |

MP2/BSS-F C, H: 6-311++G(d,p), Cl: 6-311+G(3df)

Adduct Cl-H--- $\pi$ (C<sub>6</sub>H<sub>6</sub>)  
 Symmetry C<sub>s</sub>  
 Energy E = -691.89065 au  
 Standard orientation

|    |   |           |           |           |
|----|---|-----------|-----------|-----------|
| 6  | 0 | -1.051144 | -1.401365 | 0.000000  |
| 6  | 0 | -1.051130 | -0.700659 | 1.213657  |
| 6  | 0 | -1.051130 | -0.700659 | -1.213657 |
| 6  | 0 | -1.051130 | 0.700751  | 1.213656  |
| 6  | 0 | -1.051130 | 0.700751  | -1.213656 |
| 6  | 0 | -1.051145 | 1.401456  | 0.000000  |
| 1  | 0 | -1.048088 | -2.487916 | 0.000000  |
| 1  | 0 | -1.048079 | -1.243934 | 2.154638  |
| 1  | 0 | -1.048079 | -1.243934 | -2.154638 |
| 1  | 0 | -1.048078 | 1.244025  | 2.154638  |
| 1  | 0 | -1.048078 | 1.244025  | -2.154638 |
| 1  | 0 | -1.048086 | 2.488007  | 0.000000  |
| 1  | 0 | 1.241240  | -0.000195 | 0.000000  |
| 17 | 0 | 2.522830  | -0.000101 | 0.000000  |

MP2/BSS-F C, H: 6-311++G(d,p), Br: 6-311+G(3df)  
 Adduct Br-H--- $\pi$ (C<sub>6</sub>H<sub>6</sub>)  
 Symmetry C<sub>6v</sub>  
 Energy E = -2804.9037959 au  
 Standard orientation

|    |   |           |           |           |
|----|---|-----------|-----------|-----------|
| 6  | 0 | 0.000000  | 1.401287  | -1.705664 |
| 6  | 0 | 1.213550  | 0.700644  | -1.705664 |
| 6  | 0 | -1.213550 | 0.700644  | -1.705664 |
| 6  | 0 | 1.213550  | -0.700644 | -1.705664 |
| 6  | 0 | -1.213550 | -0.700644 | -1.705664 |
| 6  | 0 | 0.000000  | -1.401287 | -1.705664 |
| 1  | 0 | 0.000000  | 2.487902  | -1.702107 |
| 1  | 0 | 2.154586  | 1.243951  | -1.702107 |
| 1  | 0 | -2.154586 | 1.243951  | -1.702107 |
| 1  | 0 | 2.154586  | -1.243951 | -1.702107 |
| 1  | 0 | -2.154586 | -1.243951 | -1.702107 |
| 1  | 0 | 0.000000  | -2.487902 | -1.702107 |
| 1  | 0 | 0.000000  | 0.000000  | 0.609459  |
| 35 | 0 | 0.000000  | 0.000000  | 2.028774  |

MP2/BSS-F C, H: 6-311++G(d,p), I: 7433211/743111/7411/2 + 1s1p1d1f  
 Adduct I-H--- $\pi$ (C<sub>6</sub>H<sub>6</sub>)  
 Symmetry C<sub>s</sub>  
 Energy E = -7150.2615906 au  
 Standard orientation

|   |   |          |           |           |
|---|---|----------|-----------|-----------|
| 6 | 0 | 2.167621 | 1.411205  | 0.000000  |
| 6 | 0 | 2.167981 | 0.710192  | 1.213835  |
| 6 | 0 | 2.167981 | 0.710192  | -1.213835 |
| 6 | 0 | 2.167981 | -0.691037 | 1.213411  |
| 6 | 0 | 2.167981 | -0.691037 | -1.213411 |
| 6 | 0 | 2.167806 | -1.391307 | 0.000000  |
| 1 | 0 | 2.165856 | 2.498011  | 0.000000  |
| 1 | 0 | 2.165856 | 1.253685  | 2.154937  |
| 1 | 0 | 2.165856 | 1.253685  | -2.154937 |

|    |   |           |           |           |
|----|---|-----------|-----------|-----------|
| 1  | 0 | 2.165335  | -1.234374 | 2.154541  |
| 1  | 0 | 2.165335  | -1.234374 | -2.154541 |
| 1  | 0 | 2.164798  | -2.478005 | 0.000000  |
| 1  | 0 | -0.116252 | 0.215346  | 0.000000  |
| 53 | 0 | -1.715488 | -0.011759 | 0.000000  |

MP2/BSS-F C, H: 6-311++G(d,p), O: 6-311+G(3df)  
 Adduct HO-H--- $\pi$ (C<sub>6</sub>H<sub>6</sub>)  
 Symmetry C<sub>s</sub>  
 Energy E = -307.906387 au  
 Standard orientation

|   |   |           |           |           |
|---|---|-----------|-----------|-----------|
| 6 | 0 | -0.621401 | -1.260462 | 0.700630  |
| 6 | 0 | -0.621401 | -1.260462 | -0.700630 |
| 6 | 0 | -0.621401 | -0.047508 | 1.401382  |
| 6 | 0 | -0.621401 | -0.047508 | -1.401382 |
| 6 | 0 | -0.621751 | 1.166072  | 0.700808  |
| 6 | 0 | -0.621751 | 1.166072  | -0.700808 |
| 1 | 0 | -0.623998 | -2.201468 | 1.244318  |
| 1 | 0 | -0.623998 | -2.201468 | -1.244318 |
| 1 | 0 | -0.618592 | -0.046843 | 2.487893  |
| 1 | 0 | -0.618592 | -0.046843 | -2.487893 |
| 1 | 0 | -0.618596 | 2.107113  | 1.243924  |
| 1 | 0 | -0.618596 | 2.107113  | -1.243924 |
| 1 | 0 | 1.727273  | 0.351651  | 0.000000  |
| 8 | 0 | 2.688595  | 0.286512  | 0.000000  |
| 1 | 0 | 2.860984  | -0.658572 | 0.000000  |

MP2/BSS-F C, H: 6-311++G(d,p), O:6-311+G(3df)  
 Adduct OH<sub>2</sub>--- $\pi$ (C<sub>6</sub>H<sub>6</sub>)  
 Symmetry C<sub>2</sub>  
 Energy E = -307.9057564 au  
 Standard orientation

|   |   |           |           |           |
|---|---|-----------|-----------|-----------|
| 6 | 0 | -1.212893 | 0.700779  | -0.614927 |
| 6 | 0 | -1.212893 | -0.700777 | -0.614927 |
| 6 | 0 | 0.000000  | 1.401519  | -0.614481 |
| 6 | 0 | 0.000000  | -1.401519 | -0.614481 |
| 6 | 0 | 1.212893  | 0.700777  | -0.614927 |
| 6 | 0 | 1.212893  | -0.700779 | -0.614927 |
| 1 | 0 | -2.154038 | 1.244433  | -0.621935 |
| 1 | 0 | -2.154039 | -1.244431 | -0.621944 |
| 1 | 0 | 0.000000  | 2.488040  | -0.614444 |
| 1 | 0 | 0.000000  | -2.488040 | -0.614444 |
| 1 | 0 | 2.154039  | 1.244431  | -0.621944 |
| 1 | 0 | 2.154038  | -1.244433 | -0.621935 |
| 1 | 0 | 0.752922  | 0.000348  | 2.105478  |
| 8 | 0 | 0.000000  | 0.000000  | 2.704714  |
| 1 | 0 | -0.752922 | -0.000348 | 2.105478  |

MP2/BSS-F C, H: 6-311++G(d,p), O: 6-311+G(3df)  
 Adduct MeO-H--- $\pi$ (C<sub>6</sub>H<sub>6</sub>)  
 Symmetry C<sub>s</sub>  
 Energy E = -347.0806409 au

## Standard orientation

|   |   |           |           |           |
|---|---|-----------|-----------|-----------|
| 6 | 0 | 1.003580  | 1.057064  | 0.700671  |
| 6 | 0 | 1.003580  | -0.155905 | 1.401385  |
| 6 | 0 | 1.003580  | 1.057064  | -0.700671 |
| 6 | 0 | 1.003430  | -1.369945 | 0.700761  |
| 6 | 0 | 1.003580  | -0.155905 | -1.401385 |
| 6 | 0 | 1.003430  | -1.369945 | -0.700761 |
| 1 | 0 | 1.005565  | 1.998304  | 1.244024  |
| 1 | 0 | 0.999243  | -0.156513 | 2.487950  |
| 1 | 0 | 1.005565  | 1.998304  | -1.244024 |
| 1 | 0 | 0.998251  | -2.310922 | 1.243930  |
| 1 | 0 | 0.999243  | -0.156513 | -2.487950 |
| 1 | 0 | 0.998251  | -2.310922 | -1.243930 |
| 1 | 0 | -1.252682 | -0.464062 | 0.000000  |
| 8 | 0 | -2.211944 | -0.381300 | 0.000000  |
| 6 | 0 | -2.540676 | 1.000102  | 0.000000  |
| 1 | 0 | -3.630587 | 1.061500  | 0.000000  |
| 1 | 0 | -2.155166 | 1.508021  | 0.892861  |
| 1 | 0 | -2.155166 | 1.508021  | -0.892861 |

MP2/BSS-F C, H: 6-311++G(d,p), N: 6-311+G(3df)

Adduct H<sub>2</sub>N-H--- $\pi$ (C<sub>6</sub>H<sub>6</sub>)Symmetry C<sub>s</sub>

Energy E = -288.0364155 au

## Standard orientation

|   |   |           |           |           |
|---|---|-----------|-----------|-----------|
| 6 | 0 | -0.654897 | -0.664448 | 1.212943  |
| 6 | 0 | -0.654897 | 0.736581  | 1.212974  |
| 6 | 0 | -0.654910 | -1.365044 | 0.000000  |
| 6 | 0 | -0.655067 | 1.437204  | 0.000000  |
| 6 | 0 | -0.654897 | -0.664448 | -1.212943 |
| 6 | 0 | -0.654897 | 0.736581  | -1.212974 |
| 1 | 0 | -0.652936 | -1.208291 | 2.153764  |
| 1 | 0 | -0.656646 | 1.279840  | 2.154304  |
| 1 | 0 | -0.648313 | -2.451476 | 0.000000  |
| 1 | 0 | -0.656194 | 2.523987  | 0.000000  |
| 1 | 0 | -0.652936 | -1.208291 | -2.153764 |
| 1 | 0 | -0.656646 | 1.279840  | -2.154304 |
| 1 | 0 | 1.772689  | -0.183485 | 0.000000  |
| 7 | 0 | 2.785036  | -0.260613 | 0.000000  |
| 1 | 0 | 3.116563  | 0.246802  | -0.813514 |
| 1 | 0 | 3.116563  | 0.246802  | 0.813514  |

MP2/BSS-F C, H: 6-311++G(d,p), N: 6-311+G(3df)

Adduct MeHN-H--- $\pi$ (C<sub>6</sub>H<sub>6</sub>)Symmetry C<sub>1</sub>

Energy E = -327.2181585 au

## Standard orientation

|   |   |          |           |           |
|---|---|----------|-----------|-----------|
| 6 | 0 | 1.498542 | -1.008897 | 0.630123  |
| 6 | 0 | 1.518873 | -0.896630 | -0.766270 |
| 6 | 0 | 1.019703 | 0.051609  | 1.410890  |
| 6 | 0 | 1.061295 | 0.276150  | -1.381916 |
| 6 | 0 | 0.562727 | 1.223835  | 0.795021  |
| 6 | 0 | 0.584086 | 1.336478  | -0.601246 |

|   |   |           |           |           |
|---|---|-----------|-----------|-----------|
| 1 | 0 | 1.851042  | -1.919009 | 1.107863  |
| 1 | 0 | 1.891184  | -1.718829 | -1.371765 |
| 1 | 0 | 0.999185  | -0.037403 | 2.493661  |
| 1 | 0 | 1.078540  | 0.363483  | -2.465145 |
| 1 | 0 | 0.191881  | 2.046496  | 1.400810  |
| 1 | 0 | 0.230308  | 2.246762  | -1.078210 |
| 1 | 0 | -1.079677 | -0.874982 | 0.088076  |
| 7 | 0 | -2.077588 | -1.050420 | 0.039180  |
| 1 | 0 | -2.230783 | -1.584350 | -0.809632 |
| 6 | 0 | -2.805276 | 0.215527  | -0.019989 |
| 1 | 0 | -3.877987 | 0.009955  | -0.083523 |
| 1 | 0 | -2.626142 | 0.768014  | 0.906809  |
| 1 | 0 | -2.524136 | 0.864376  | -0.862888 |

MP2/BSS-F C, H: 6-311++G(d,p), N: 6-311+G(3df)  
 Adduct Me<sub>2</sub>N-H---π(C<sub>6</sub>H<sub>6</sub>)  
 Symmetry C<sub>1</sub>  
 Energy E = -366.407443 au  
 Standard orientation

|   |   |           |           |           |
|---|---|-----------|-----------|-----------|
| 6 | 0 | -1.022056 | 0.704142  | 1.277439  |
| 6 | 0 | -1.020947 | -0.696417 | 1.281751  |
| 6 | 0 | -1.328159 | 1.400955  | 0.100831  |
| 6 | 0 | -1.325963 | -1.400939 | 0.109461  |
| 6 | 0 | -1.632619 | 0.697074  | -1.071717 |
| 6 | 0 | -1.631527 | -0.704773 | -1.067395 |
| 1 | 0 | -0.786223 | 1.250838  | 2.186738  |
| 1 | 0 | -0.784272 | -1.237131 | 2.194404  |
| 1 | 0 | -1.329177 | 2.487873  | 0.097727  |
| 1 | 0 | -1.325255 | -2.487857 | 0.113051  |
| 1 | 0 | -1.867069 | 1.237133  | -1.985126 |
| 1 | 0 | -1.865144 | -1.250815 | -1.977456 |
| 1 | 0 | 0.813927  | -0.000081 | -0.676919 |
| 7 | 0 | 1.827785  | -0.000079 | -0.669112 |
| 6 | 0 | 2.295430  | -1.203042 | -0.002694 |
| 1 | 0 | 3.384847  | -1.269994 | -0.102067 |
| 1 | 0 | 1.852838  | -2.082105 | -0.480030 |
| 1 | 0 | 2.047937  | -1.224847 | 1.074416  |
| 6 | 0 | 2.295424  | 1.203066  | -0.003017 |
| 1 | 0 | 3.384841  | 1.269996  | -0.102405 |
| 1 | 0 | 1.852828  | 2.082001  | -0.480586 |
| 1 | 0 | 2.047928  | 1.225150  | 1.074087  |
